# Supplementary material
Source: PubMed Central journal article supplement (PMC10935632)

TableS1–PedsCom *rpoB* gene primers and probes. Related to STAR Methods section.

| Isolate                         | Primer         | Sequence (5' to 3')                 | 5' Dye | 3' Quencher |
|---------------------------------|----------------|-------------------------------------|--------|-------------|
| Anaerostipes sp. PC18           | Forward Primer | TGGAAGTGGCGGATAAGA                  | NA     | NA          |
|                                 | Reverse Primer | GCCAGGTTTACGGTCATATT                | NA     | NA          |
|                                 | Probe          | TGC CGC TGT TCA GAG TGT GCT GAT     | VIC    | MGBNFQ      |
| Clostridium intestinale PC17    | Forward Primer | GGTAGTTCGCAGCTTTCTC                 | NA     | NA          |
|                                 | Reverse Primer | CTTCAAACCCAGCTCTTTCT                | NA     | NA          |
|                                 | Probe          | TCA GCT TTA GGA CCT GGA GGA CTT TCA | JUN    | QSY         |
| Kosakonia cowanii PC08          | Forward Primer | GAAGACCTGAACGTCGATAAC               | NA     | NA          |
|                                 | Reverse Primer | GCTGACACCAGAAGAGAAAC                | NA     | NA          |
|                                 | Probe          | AAA CAC CGT TTG GTA CGC GCA GAG     | 6FAM   | MGBNFQ      |
| Enterococcus faecalis PC15      | Forward Primer | CTCGTTCAATCGGACCTTAC                | NA     | NA          |
|                                 | Reverse Primer | TTCCAGTGCCCAAACCTTC                 | NA     | NA          |
|                                 | Probe          | ACG CAA CAA CCG TTG GGT GGT AAA     | JUN    | QSY         |
| Lactobacillus johnsonii PC38    | Forward Primer | ACAACCACTTGGTGGTAAAG                | NA     | NA          |
|                                 | Reverse Primer | GTGTGTAAGCAGCACCATAA                | NA     | NA          |
|                                 | Probe          | TTG GTG GTC AGC GTT TCG GTG AAA     | 6FAM   | MGBNFQ      |
| Lactobacillus murinus PC39      | Forward Primer | TGGTGCTTGGTTGGAATAC                 | NA     | NA          |
|                                 | Reverse Primer | CCCAAAGCACGGATCAAT                  | NA     | NA          |
|                                 | Probe          | TCG ACC GCA CAC GTA AGA TCC CAT     | VIC    | MGBNFQ      |
| Parabacteroides distasonis PC19 | Forward Primer | TGAGTAACCCTCGGTAAGG                 | NA     | NA          |
|                                 | Reverse Primer | GCGTAAGACCAACCAAAGTA                | NA     | NA          |
|                                 | Probe          | TCA TCG CGG ACA ACG TGT GAA AGC     | JUN    | QSY         |
| Staphylococcus sciuri PC04      | Forward Primer | ACGTGCTCAACTCTACCT                  | NA     | NA          |
|                                 | Reverse Primer | ACCCAGAAGCACCATTTG                  | NA     | NA          |
|                                 | Probe          | ACG TGC AGT TAC GTG TTC CAT ACC AGT | VIC    | MGBNFQ      |
| Staphylococcus xylosus PC20     | Forward Primer | GTAGTGACAAGAGGCGAAAT                | NA     | NA          |
|                                 | Reverse Primer | TCACGGCATCCTCATAGT                  | NA     | NA          |
|                                 | Probe          | TGT TGG TTT CAT GAC TTG GGA CGG T   | 6FAM   | MGBNFQ      |

**Supplemental Figure 1. Low complexity of the pre-weaning microbial community enables the PedsCom consortium to recapitulate early-life microbial abundance and function, related to Figure 1**

**A.** Alpha diversity of the intestinal microbiomes from 14-day-old donor mice (N = 4 samples per tissue site). **B.** Percentage of the total amplicon sequence variants (ASVs) present in each tissue that were recovered from bacterial culture plates. **C.** Median relative abundance of remaining non-PedsCom donor ASVs in the fecal microbiomes of 10-week-old adult SPF NOD mice (N = 19). **D.** Species-level distribution of the non-PedsCom ASVs present in the donor mice small intestine, cecum and large intestine samples. Median relative abundance of the top 20 species shown. **E.** Assessment of the functional potential of non-PedsCom taxa in donor mice samples. Mean relative abundance of KEGG orthologs (KOs) absent in the PedsCom consortium collapsed into KEGG superpathways. **F.** Significantly different abundances of non-PedsCom ASVs present in the donor mice in pre ( $\leq 14$  days-old) and post-weaning ( $> 14$  days-old) fecal microbiomes of SPF NOD mice. Differential abundances determined by ANCOM analysis with FDR corrected p-values.

**Supplemental Figure 2. Community dynamics of PedsCom consortium is restricted during weaning, related to Figure 2**

**A.** Weighted UniFrac PCoA beta-diversity of small intestinal microbiota of PedsCom (N: D14 = 3, D21 = 5, D28 = 2) and CMCom (N: D14 = 5, D21 = 8, D28 = 2) mice during ontogeny. **B.** Weighted UniFrac PCoA beta-diversity of cecal microbiota of PedsCom (N: D14 = 6, D21 = 5, D28 = 4) and CMCom (N: D14 = 5, D21 = 7, D28 = 6) mice during ontogeny. **C.** Species and family level 16S rRNA gene relative abundance of microbiota from PedsCom and CMCom mice during ontogeny in the small intestine. Two representative litters for CMCom per timepoint, one litter represented in PedsCom. **D.** Species and family level 16S rRNA gene relative abundance of microbiota from PedsCom and CMCom mice during ontogeny in the cecum. Two representative litters for communities per timepoint. **E.** Representative relative abundance of adult PedsCom and CMCom intestinal microbiota at species and family level.

**Supplemental Figure 3. Community similarities of PedsCom, CMCom and Oligo-MM12 mice to pre- and post-weaning SPF fecal microbiomes, related to Figure 2**

**A.** Weighted UniFrac PCoA of large intestinal microbiota of pre- ( $\leq 14$  days-old) and post-weaning ( $> 14$  days-old) vivarium 3 mice (N = 25) to PedsCom and Oligo-MM12 (N = 51). **B.** Weighted UniFrac distance comparison of pre-weaning ( $\leq$  day 14) and post-weaning ( $>$  day 14) vivarium 3 mice to all PedsCom and Oligo-MM12 timepoints. Data presented with median box and whisker plot. Mann-Whitney-Wilcoxon test \*\*\*\*p<0.0001.

**Supplemental Figure 4. Lymphoid cell populations of germfree, CMCom and PedsCom mice at weaning, related to Figure 3**

Percentage of CD19<sup>+</sup> B cells and  $\gamma\delta$ ,  $\alpha\beta$ , CD8<sup>+</sup>, CD4<sup>+</sup>, Foxp3<sup>+</sup> (Tregs), and Foxp3<sup>-</sup> ROR $\gamma$ <sup>+</sup> (Th17) T cells in the small intestine, cecum and large intestine lamina propria of germfree, PedsCom and CMCom mice during ontogeny. N = 3 for day 21 germfree cecum, N = 3 for comparisons of day 21 PedsCom  $\alpha\beta$ , CD8<sup>+</sup>, CD4<sup>+</sup>, and Th17 T cells, and N  $\geq 4$  per other communities and timepoints. Lines represent median value for each community.

### **Supplemental Figure 5. Lymphoid cell populations of adult germfree, CMCom, and PedsCom mice, related to Figure 3**

Percentage of CD19<sup>+</sup> B cells and  $\gamma\delta$ ,  $\alpha\beta$ , CD8<sup>+</sup>, CD4<sup>+</sup>, Foxp3<sup>+</sup> (Tregs), and Foxp3<sup>-</sup> ROR $\gamma$ <sup>+</sup> (Th17) T cells in the small intestine, cecum and large intestine lamina propria of germfree, PedsCom and CMCom 7–12-week-old adult mice. N  $\geq$  4 for germfree tissues, N  $\geq$  6 other communities and timepoints. Data presented with box and whisker plot.

### **Supplemental Figure 6. PedsCom consortium leads to lower cecal acetate and butyrate levels and increased systemic immunoglobulin levels, related to Figure 3-4**

Acetic, propionic, isobutyric, and butyric acid concentrations in cecal contents of the indicated microbial communities at **A.** weaning (day 21) and **B.** adulthood (8-14 weeks old). N = 5 per timepoint, per group. GF = Germfree, CC = CMCom, PC = PedsCom, OMM12 = Oligo-MM12. **C.** Short-chain fatty acid concentration in cecal samples from adult CMCom (CC-ZT) and PedsCom (PC-ZT) mice sampled at ZT1500. N = 5 per group. **D.** Acetic, propionic, isobutyric, and butyric acid concentrations in cecal contents from adult CMCom and PedsCom mice sampled at ZT1500. **E.** ELISA of serum IgG1, IgG2b, IgG2c and IgE concentration in 7-12-week-old adult PedsCom and CMCom mice. N values: (Germfree = 8, CMCom = 18, PedsCom = 14). **F.** Representative gating scheme of microbial flow cytometry (mFLOW) analysis of immunoglobulin binding to fecal microbes. **G.** Acetic, propionic, isobutyric, and butyric acid concentrations in cecal contents from PedsCom co-housed mice. [Control (PC) N = 4, Co-housed (PC+CC) N = 5]. **H.** Primary bile acid concentration (median) in cecal contents from PedsCom co-housed mice (Control N = 4, Co-housed N = 5). Bile acid concentrations from SPF cecal contents included for comparison (N = 6). **I.** The median molar ratios of primary deconjugated to primary conjugated bile acids in PedsCom co-housed mice (Control N = 4, Co-housed N = 5). **J.** Percent mucosal IgA and systemic Ig binding to PedsCom co-housed fecal microbes (Control N = 4, Co-housed N = 5). **K.** Percentage of pTreg cells in the cecum, large intestine lamina propria and spleen of adult PedsCom mice supplemented with short-chain fatty acids at weaning and controls (Control N = 4, SCFA treated N = 5). Data presented with box and whisker plot. Mann-Whitney-Wilcoxon test \*p<0.05, \*\*p<0.01

# Fig. S1

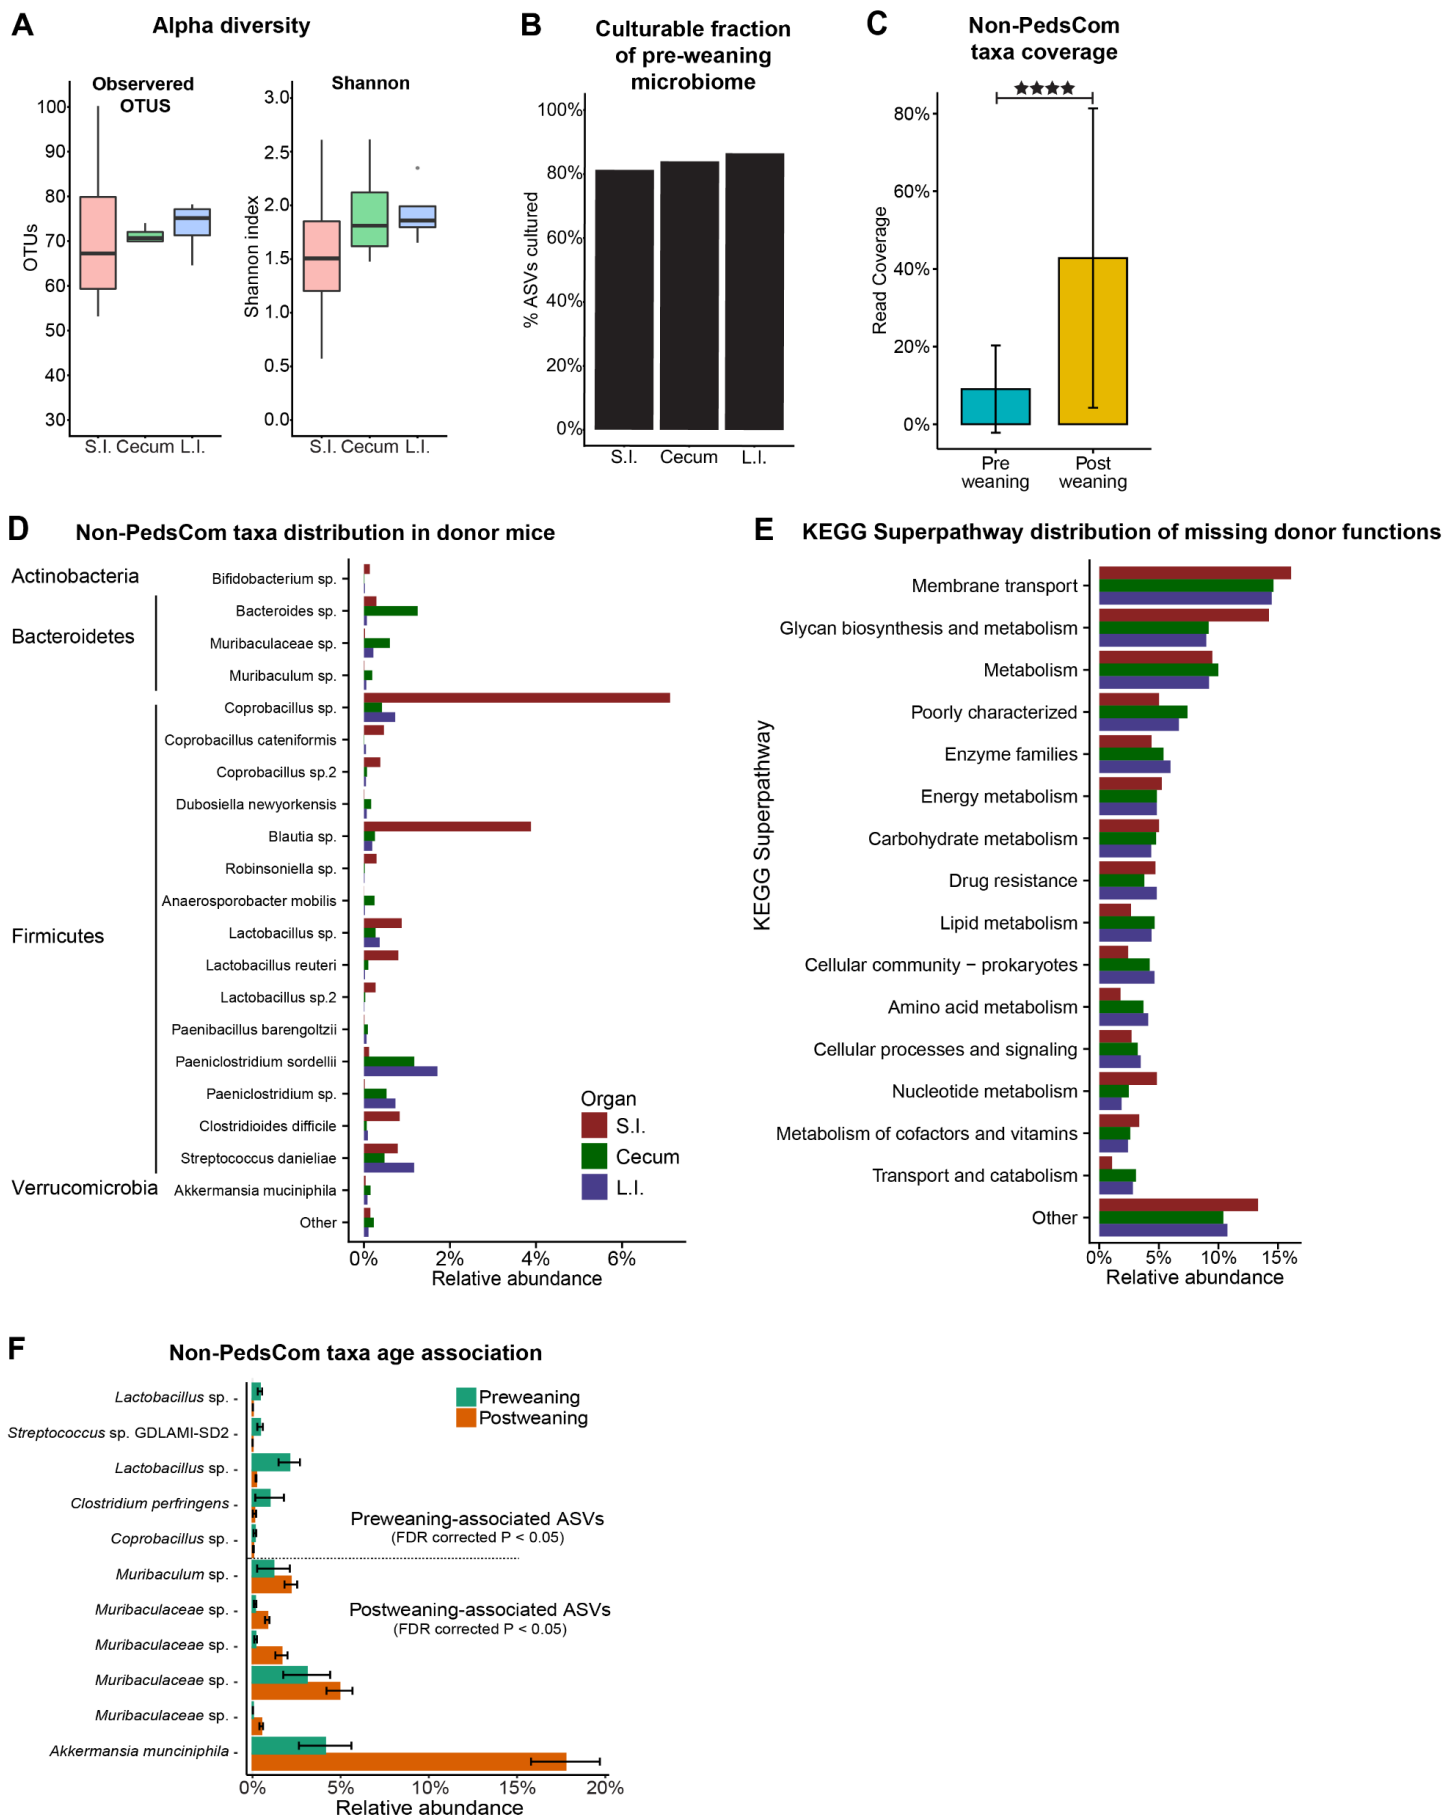

Fig. S2

A Weighted UniFrac of PedsCom during ontogeny

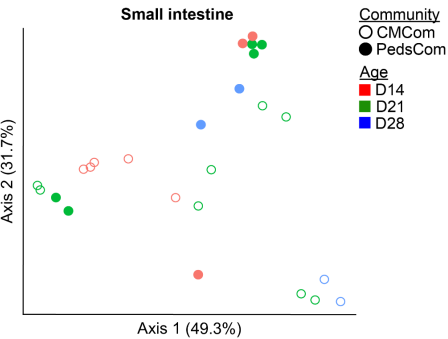

B Weighted UniFrac of PedsCom during ontogeny

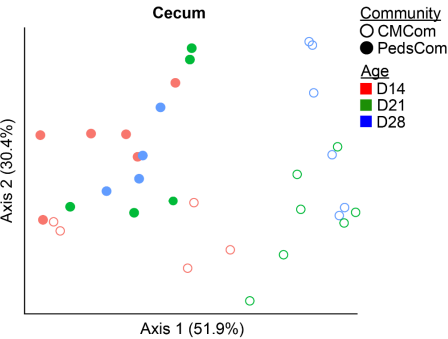

C

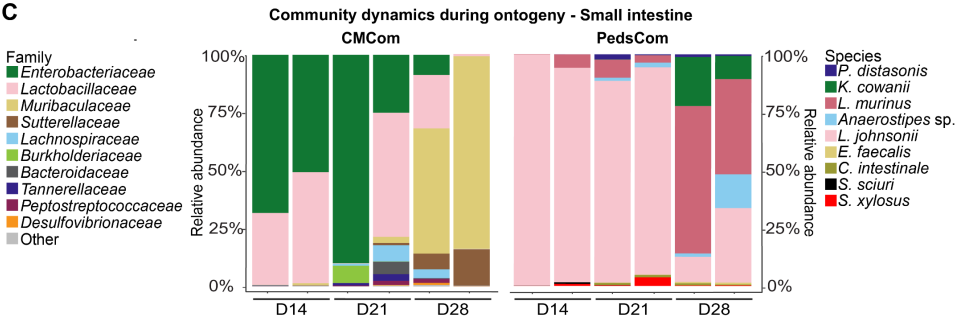

D

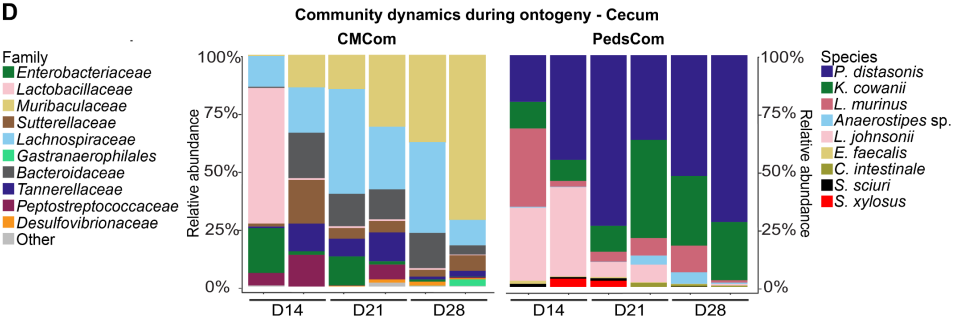

E

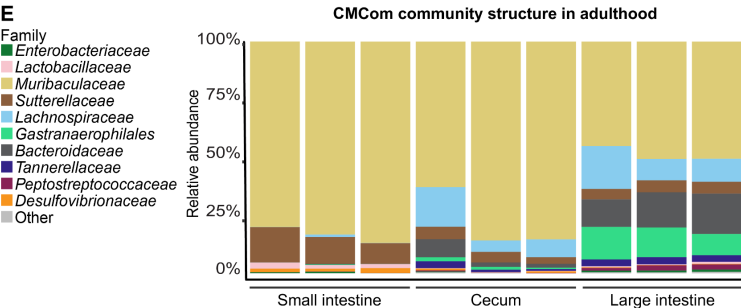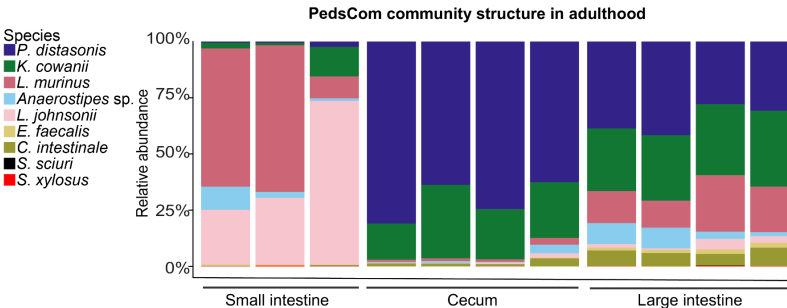

Fig. S3

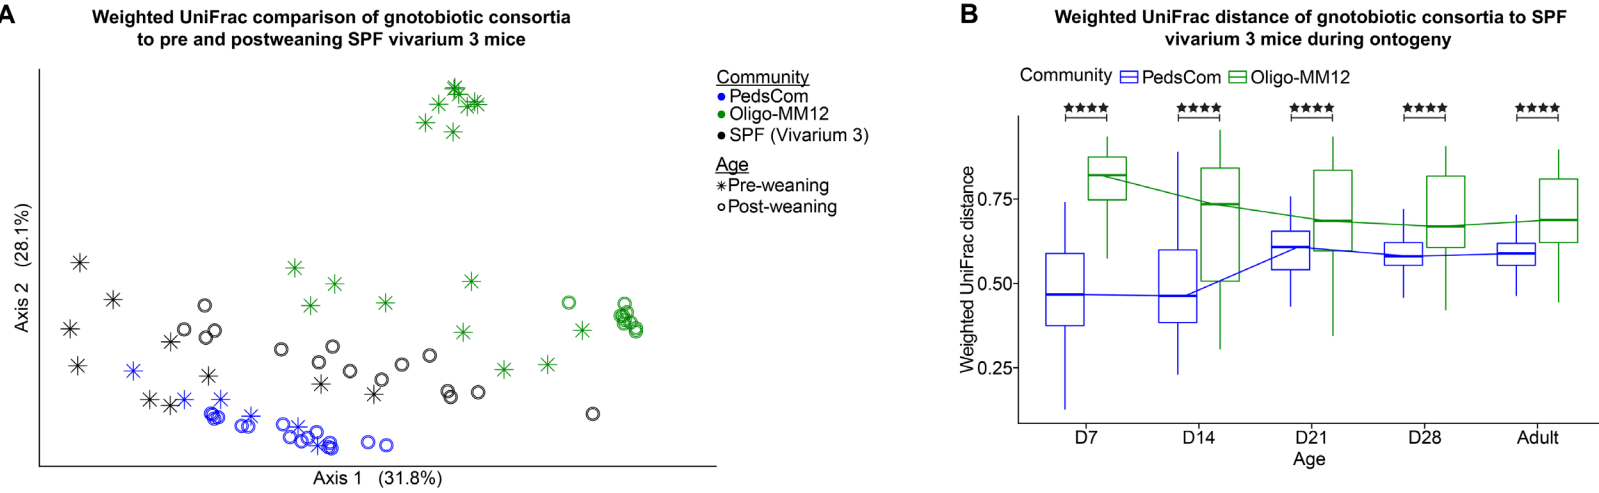

Fig. S4

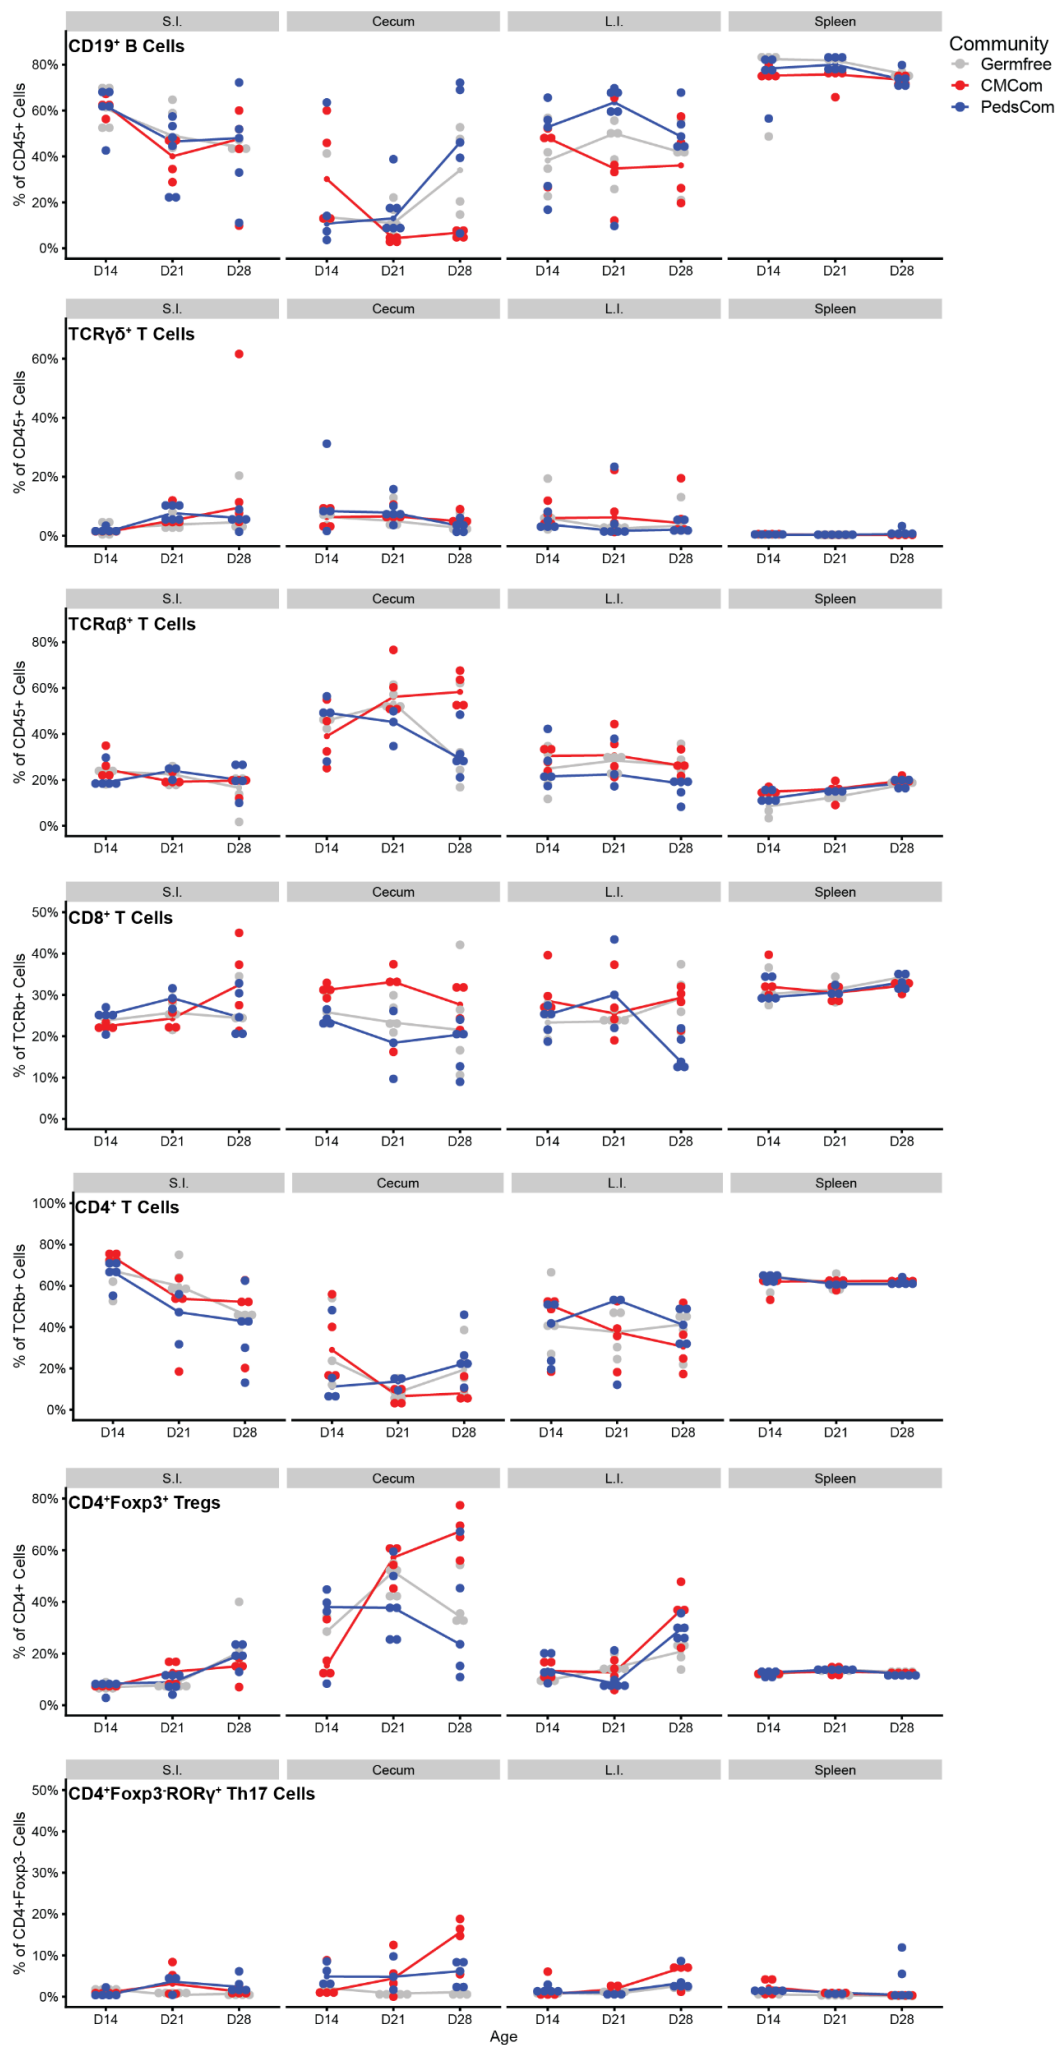

Fig. S5

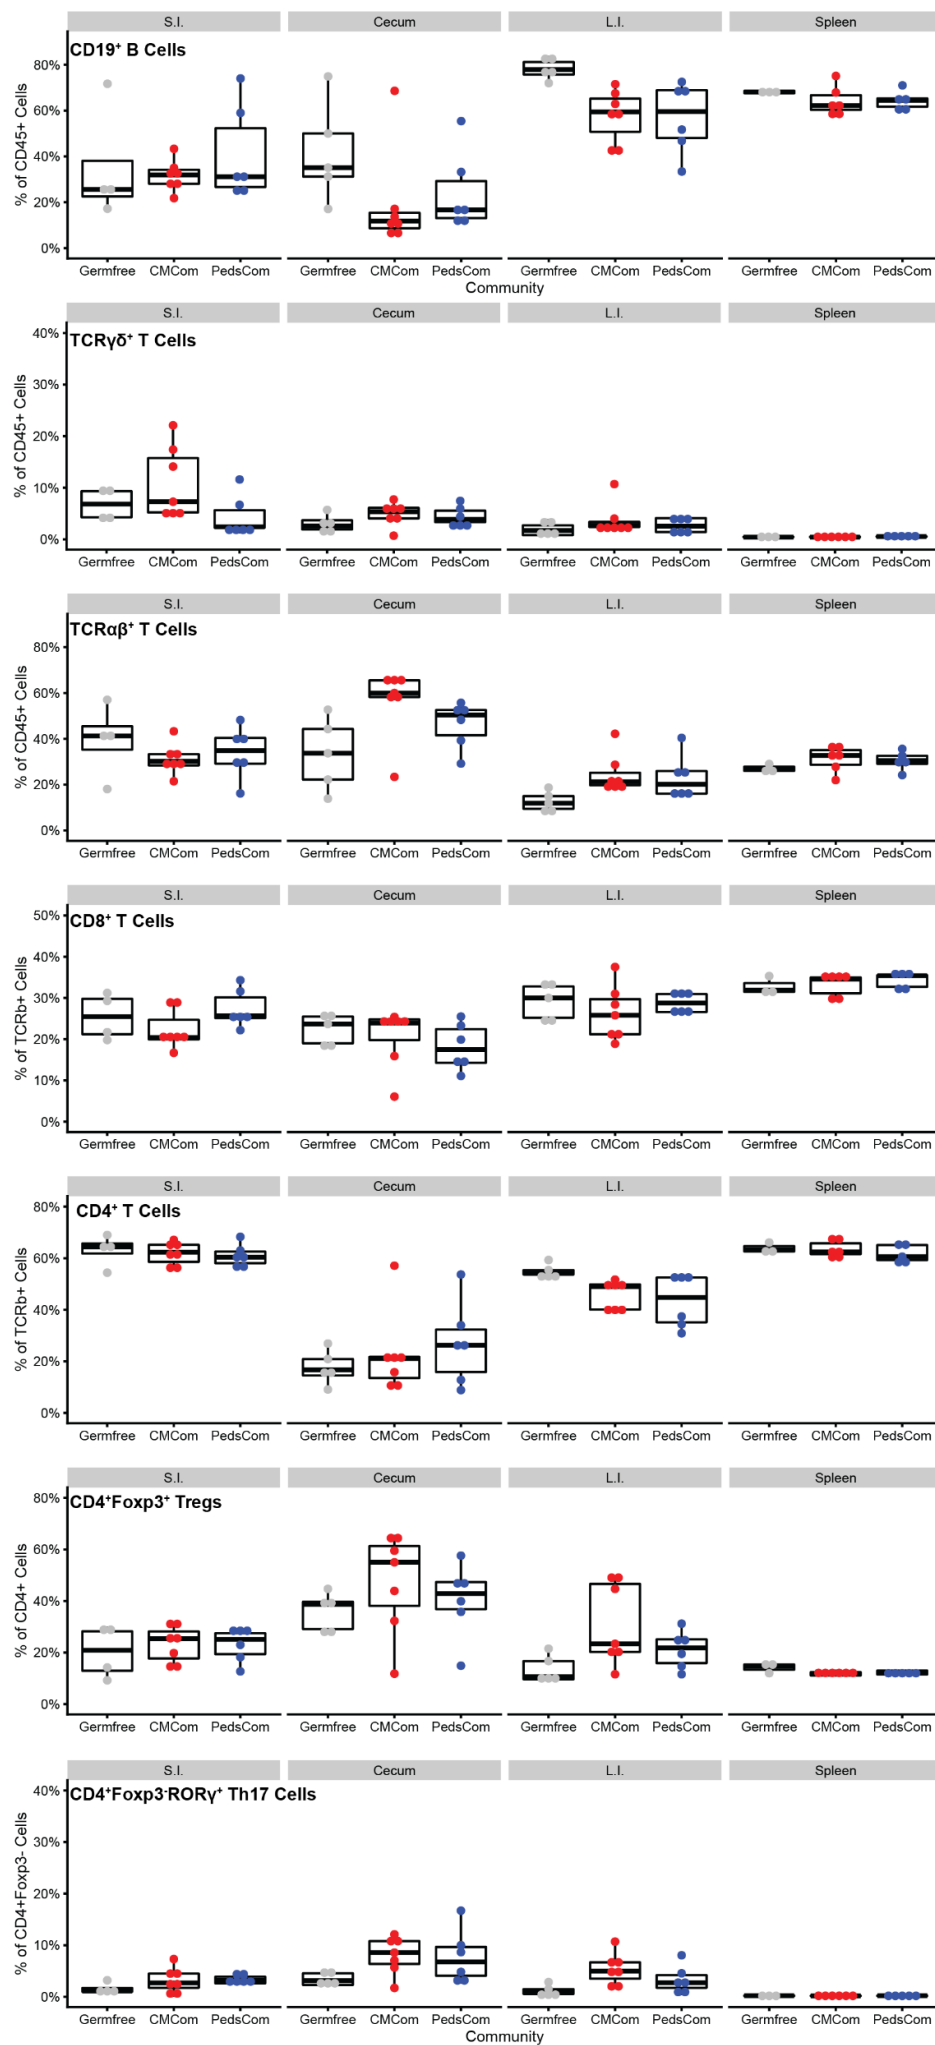

Fig. S6

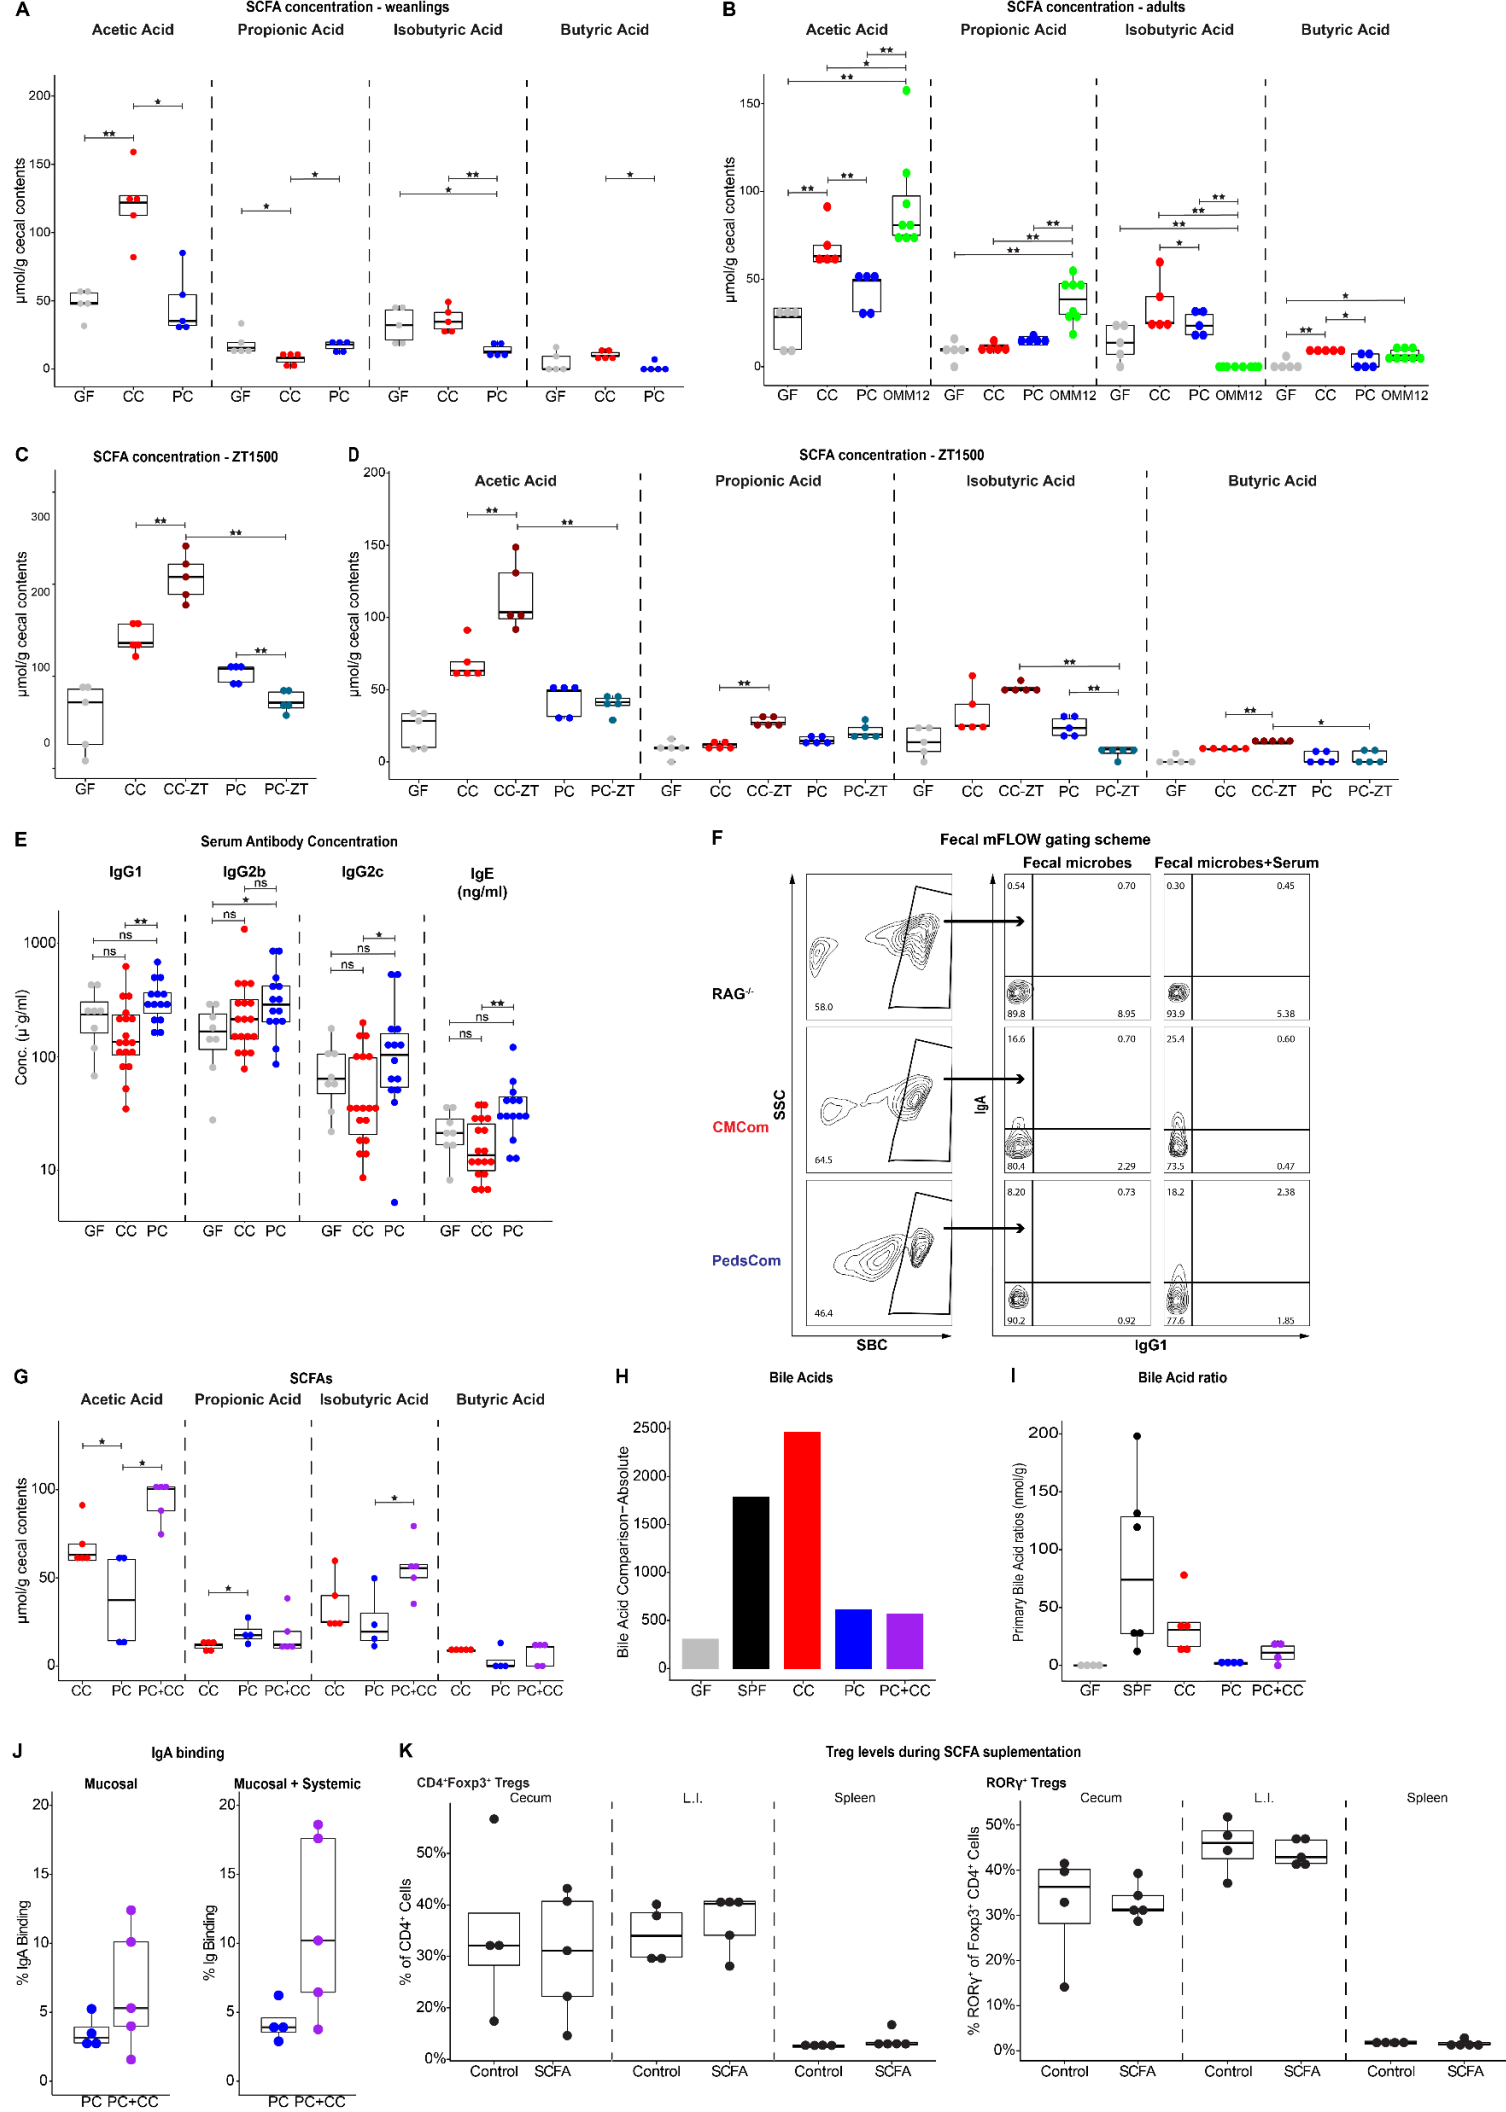

Supplement: NIHMS1888455-supplement-1.pdf [file NIHMS1888455-supplement-1.pdf]
